# Supplementary material
Source: publisher figshare collection journal article supplement (https://acs.figshare.com/ndownloader/files/25174053)
Supplement: Supplementary file 1 [file 25174053]

# SUPPORTING INFORMATION

## Operando Observations of a Manganese Oxide Electrocatalyst for Water Oxidation using Hard/Tender/Soft X-ray Absorption Spectroscopy

Shun Tsunekawa,<sup>†</sup> Futaba Yamamoto,<sup>Δ</sup> Ke-Hsuan Wang,<sup>‡</sup> Masanari Nagasaka,<sup>#</sup> Hayato Yuzawa,<sup>#</sup> Hiroshi Kondoh,<sup>Δ</sup> Satoru Takakusagi,<sup>†</sup> Kiyotaka Asakura,<sup>†</sup> Takeshi Kawai,<sup>‡</sup> and Masaaki Yoshida<sup>\*,†,§,||</sup>

<sup>†</sup>*Yamaguchi University, Tokiwadai, Ube, Yamaguchi 755-8611, Japan*

<sup>Δ</sup>*Keio University, Yokohama, Kanagawa 223-8522, Japan*

<sup>‡</sup>*Tokyo University of Science, Kagurazaka, Shinjuku-ku, Tokyo 162-8601, Japan*

<sup>#</sup>*Institute for Molecular Science, Myodaiji, Okazaki 444-8585, Japan*

<sup>†</sup>*Institute for Catalysis, Hokkaido University, Sapporo 001-0021, Japan*

<sup>§</sup>*ICAT Fellow, Institute for Catalysis, Hokkaido University, Japan*

<sup>||</sup>*Blue energy center for SGE technology (BEST), Ube, Yamaguchi 755-8611, Japan*

**E-mail:** [yoshida3@yamaguchi-u.ac.jp](mailto:yoshida3@yamaguchi-u.ac.jp)

| Index                                                                                                       | Page |
|-------------------------------------------------------------------------------------------------------------|------|
| i) Schematic images of operando XAFS measurements                                                           | S2   |
| ii) Film thickness of K:MnO <sub>x</sub> catalyst                                                           | S3   |
| iii) Current and cycle measurement of Mn K-edge XAFS                                                        | S4   |
| iv) Curve fitting analysis of K:MnO <sub>x</sub> using δ-MnO <sub>2</sub> and γ-MnO <sub>2</sub> structures | S5   |
| v) Curve fitting analysis of K:MnO <sub>x</sub> at different electrode potential                            | S6   |
| vi) Comparison of O K-edge XAFS spectra and current during operando condition                               | S7   |
| vii) K K-edge XAFS during electrodeposition and current during operando condition                           | S8   |

i) Schematic images of operando XAFS measurements

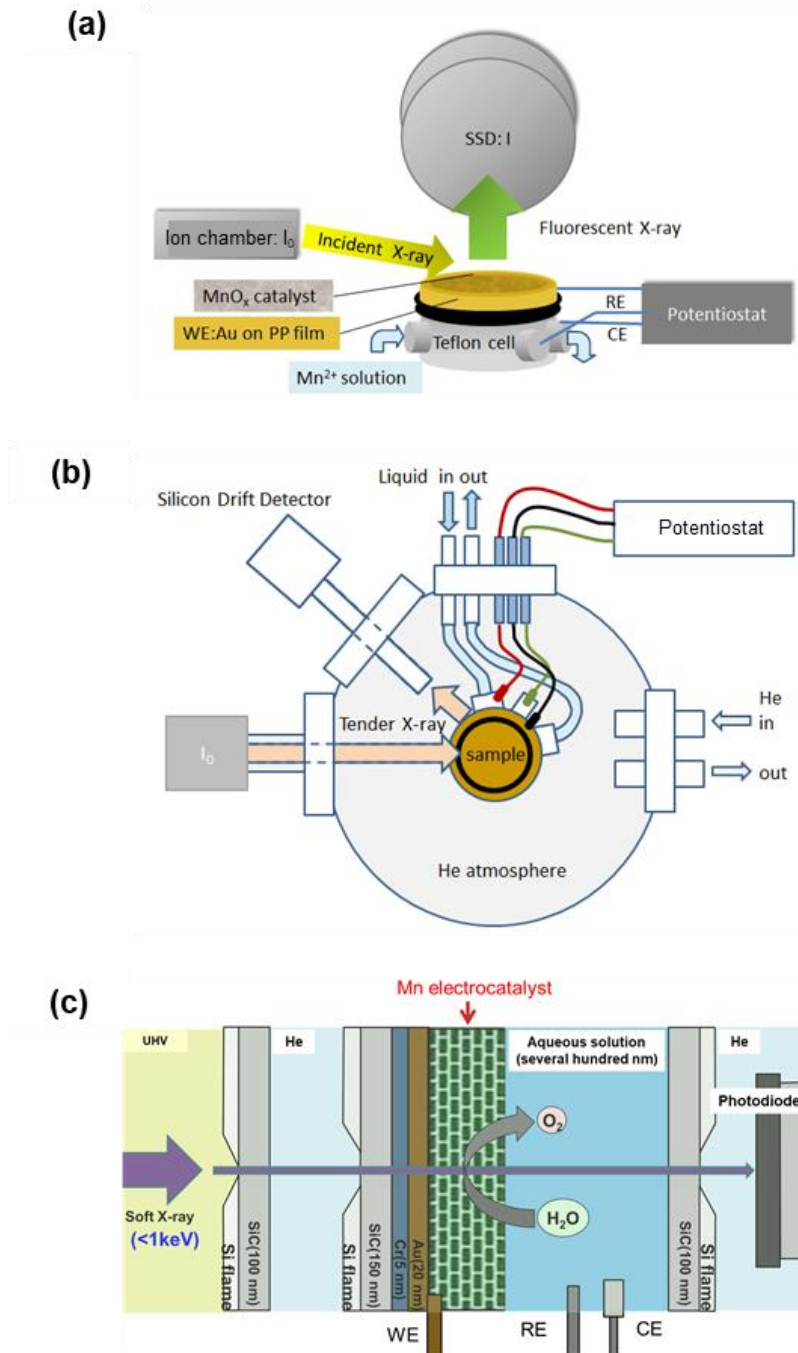

**Figure S1.** Schematic images of process used to obtain operando XAFS measurements using (a) hard X-rays, (b) tender X-rays, and (c) soft X-rays.

ii) Film thickness of K:MnO<sub>x</sub> catalyst

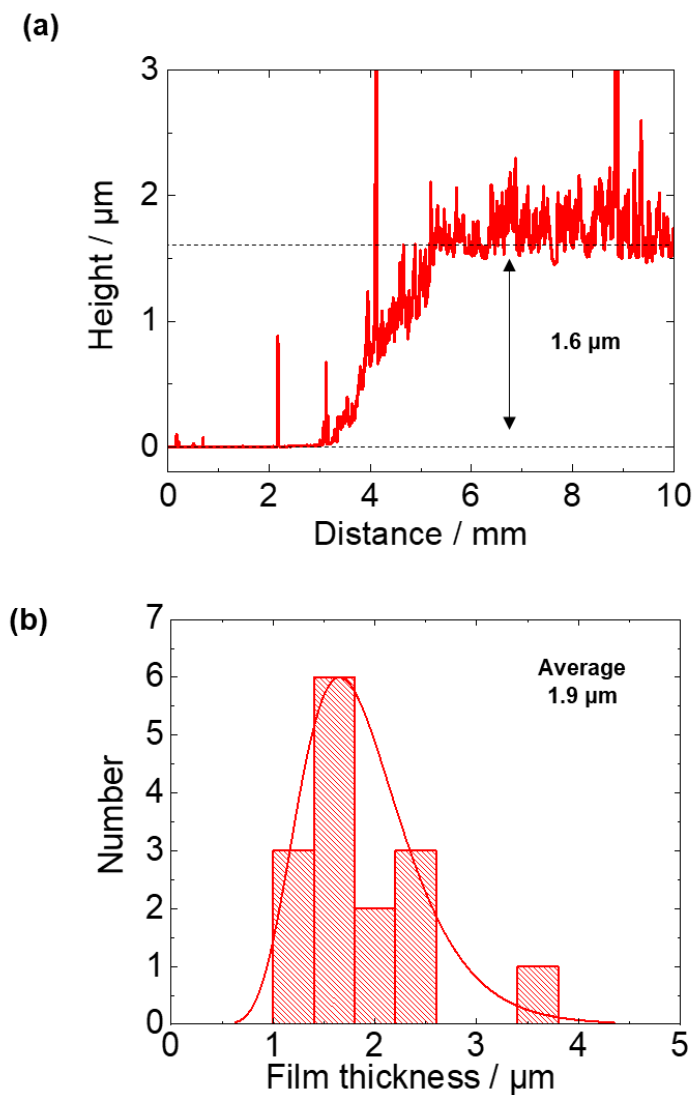

**Figure S2.** (a) Surface profilometry of a K:MnO<sub>x</sub> catalyst electrodeposited on ITO substrate. (b) Film thickness distribution of 15 samples of K:MnO<sub>x</sub> catalyst. The average film thickness was estimated as ca. 1.9  $\mu\text{m}$ .

### iii) Current and cycle measurement of Mn K-edge XAFS

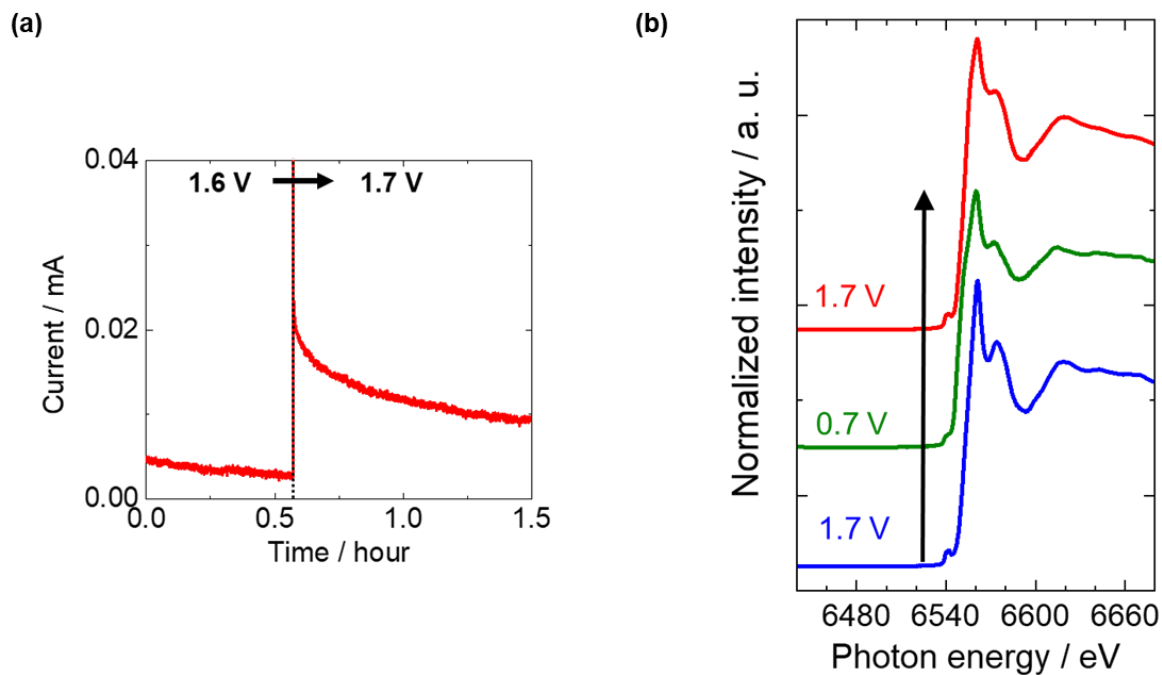

**Figure S3.** (a) Time course of OER current during operando Mn K-edge XAFS condition for K:MnO<sub>x</sub> catalyst at 1.7 V vs. RHE in phosphoric acid buffer solution at pH 8, confirming that the spectra were obtained under operando measurements. (b) Cycle measurement of operando Mn K-edge XAFS for K:MnO<sub>x</sub> catalyst in phosphoric acid buffer solution at pH 8.

iv) Curve fitting analysis of K:MnO<sub>x</sub> using  $\delta$ -MnO<sub>2</sub> and  $\lambda$ -MnO<sub>2</sub> structures

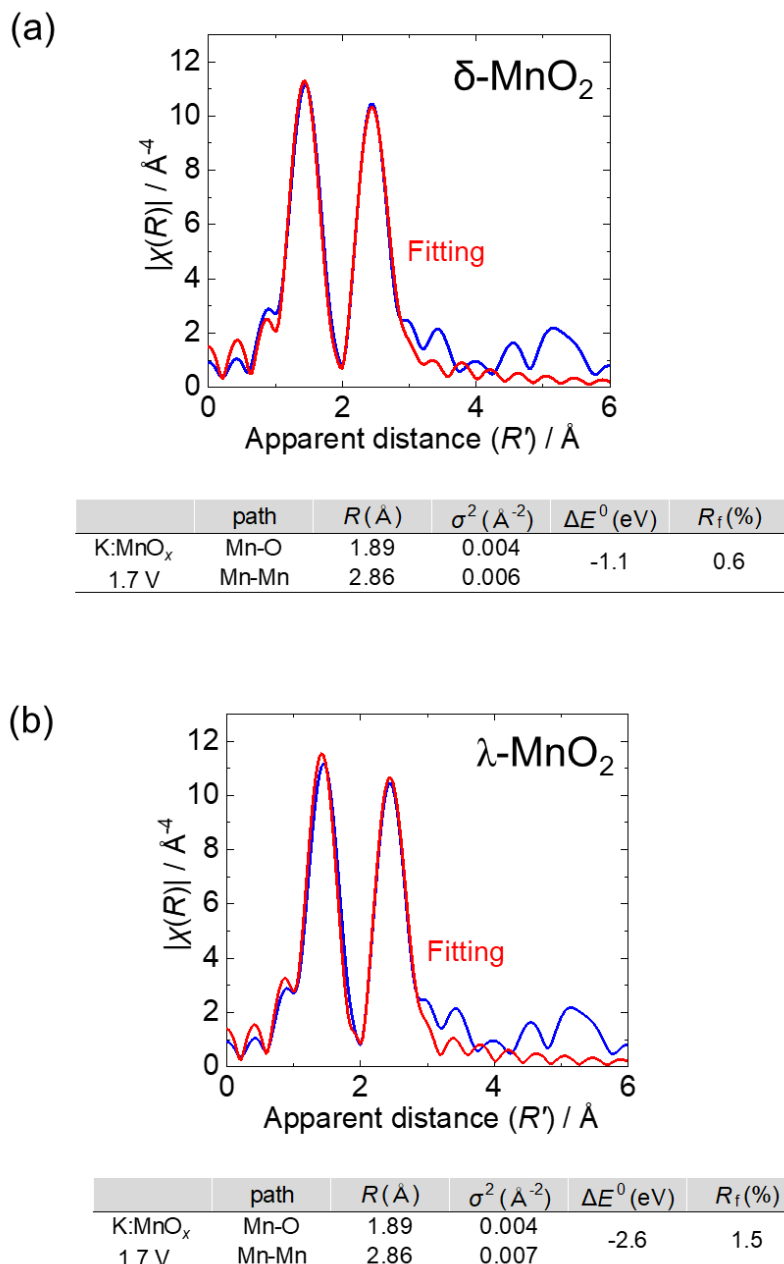

**Figure S4.** Curve fitting analysis of Mn K-edge XAFS for K:MnO<sub>x</sub> at 1.7 V vs. RHE using single crystal structure data of (a)  $\delta$ -MnO<sub>2</sub> and (b)  $\lambda$ -MnO<sub>2</sub>. The coordination number was fixed to 6. The result shows that K:MnO<sub>x</sub> catalyst was more consistent with the  $\delta$ -MnO<sub>2</sub> structure than with the  $\lambda$ -MnO<sub>2</sub> structure.

v) Curve fitting analysis of K:MnO<sub>x</sub> at different electrode potential

|                          | path  | $R(\text{\AA})$ | $\sigma^2(\text{\AA}^{-2})$ | $\Delta E^0(\text{eV})$ | $R_f(\%)$ |
|--------------------------|-------|-----------------|-----------------------------|-------------------------|-----------|
| $\delta\text{-MnO}_2$    | Mn-O  | 1.90            | 0.005                       | -1.4                    | 0.9       |
|                          | Mn-Mn | 2.88            | 0.007                       |                         |           |
| K:MnO <sub>x</sub> 0.7 V | Mn-O  | 1.89            | 0.010                       | -4.3                    | 8.6       |
|                          | Mn-Mn | 2.87            | 0.011                       |                         |           |
| K:MnO <sub>x</sub> 1.7 V | Mn-O  | 1.89            | 0.004                       | -1.1                    | 0.6       |
|                          | Mn-Mn | 2.86            | 0.006                       |                         |           |

**Figure S5.** Curve fitting analysis of Mn K-edge XAFS for  $\delta\text{-MnO}_2$  powder and K:MnO<sub>x</sub> at 0.7 and 1.7 V vs. RHE. The coordination number was fixed to 6. The result indicates that Debye–Waller factor( $\sigma^2$ ) is changing by electrode potential.

vi) Comparison of O K-edge XAFS spectra and current during operando condition

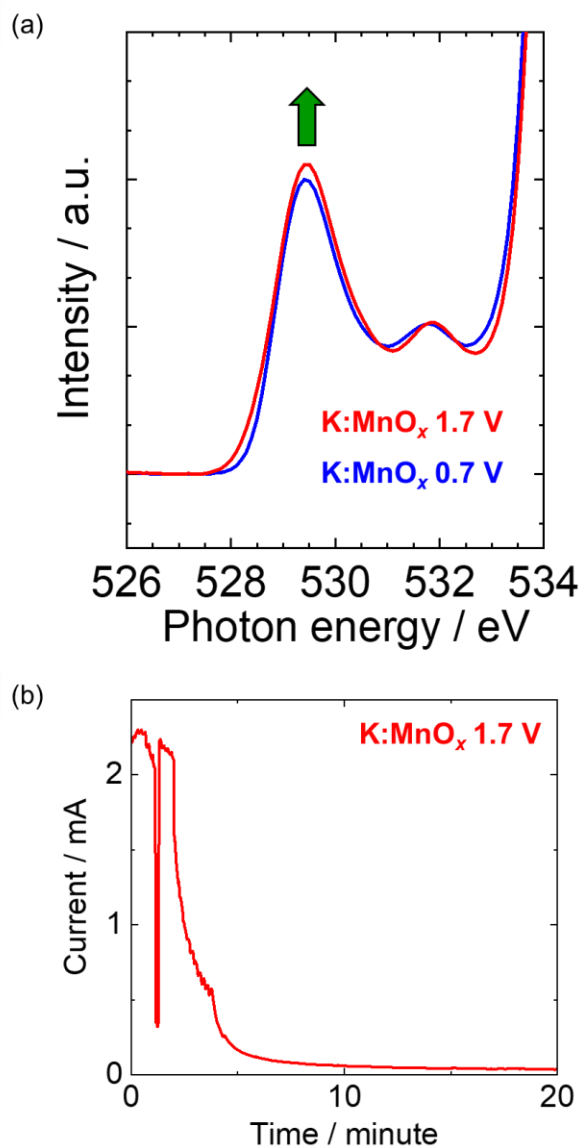

**Figure S6.** (a) Comparison of operando O K-edge XAFS spectra from 1.0 to 0.0 V for K:MnO<sub>x</sub> catalyst in phosphoric acid buffer solution at pH 8. A slight increase in the lower energy peak was observed for the spectrum at 1.7 V vs. RHE. (b) Time course of OER current during operando O K-edge XAFS for K:MnO<sub>x</sub> catalyst in phosphoric acid buffer solution at pH 8, confirming that the spectra were obtained under operando measurements. Note that the current is decreasing with time, because the flow of electrolyte solution is restricted due to the electrolyte thickness of several hundred nanometers.

vii) K K-edge XAFS during electrodeposition and current during operando condition

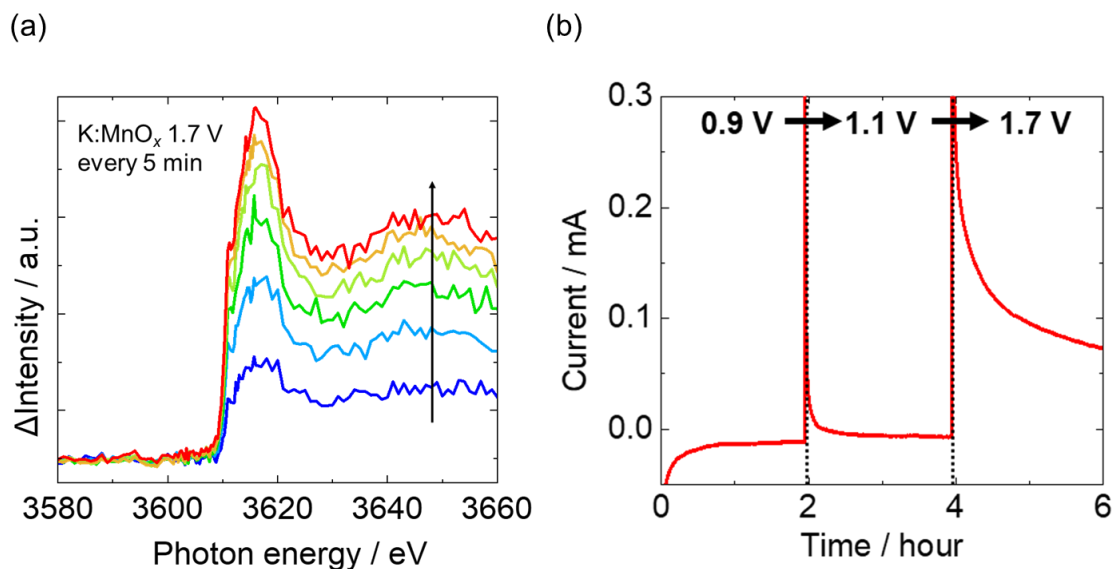

**Figure S7.** (a) *In situ* K K-edge XAFS spectra for electrodeposition process of K:MnO<sub>x</sub> catalyst at 1.7 V vs. RHE in methylphosphonic acid solution containing MnCl<sub>2</sub>·4H<sub>2</sub>O at pH 8. To avoid the effect of K<sup>+</sup> in the electrolyte solution, the intensity of each spectrum was subtracted by that of the K spectrum before applying electrode potential. The intensity increased with the amount of electrodeposited catalyst, indicating that the spectra could be attributed to the K species in the K:MnO<sub>x</sub>. (b) Time course of OER current during operando K K-edge XAFS condition for K:MnO<sub>x</sub> catalyst in phosphoric acid buffer solution at pH 8, confirming that the spectra were obtained under operando measurements.
